# Supplementary material
Source: HighWire-hosted journal article supplement (https://www.jneurosci.org/highwire/filestream/597549/field_highwire_adjunct_files/1/SupplFig1.pdf)
Supplement: SupplFig1.pdf [file SupplFig1.pdf]

## SUPPLEMENTARY FIGURE 1

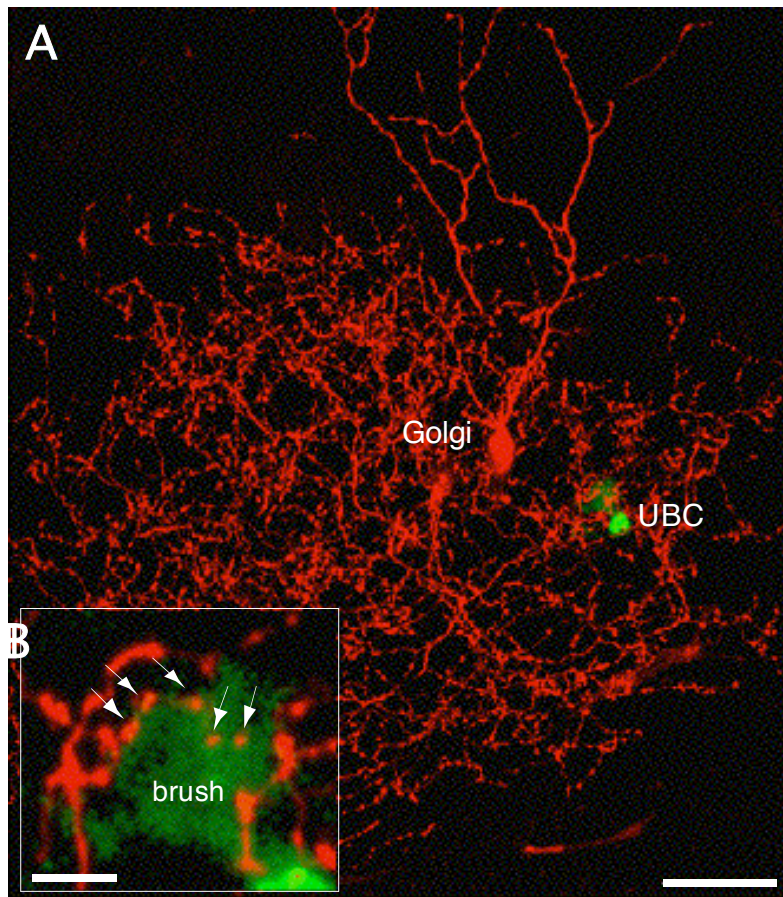

SUPPLEMENTARY FIGURE 1. Identified contact between a Golgi cell and an UBC. A Golgi cell and an UBC were simultaneously recorded and filled with 4 mg/mL neurobiotin and 100  $\mu$ M Alexa 488, respectively. (a) Golgi cell (red) and UBC (green) identified on the basis of their respective intracellular tracer and typical morphology. Note that the UBC lies within the mesh of the Golgi cell axonal arborisation. The image is the projection of 32 sections taken at a 2  $\mu$ m interval. (b) High magnification of the UBC brush contacted by Golgi cell axonal varicosities (arrows). The image is the projection of 20 confocal sections taken at a 0.36  $\mu$ m interval. Scale bars: 40  $\mu$ m in (a), 5  $\mu$ m in (b).
